# Supplementary material for: Naive B cells in neuromyelitis optica spectrum disorders: impact of steroid use and relapses
Source: PubMed Central journal article supplement — Brain Commun. 2020 Nov 16;2(2):fcaa197. doi: 10.1093/braincomms/fcaa197 (PMC7714275; doi:10.1093/braincomms/fcaa197), 2020-11-16
Supplement: fcaa197_supplementary_data.pdf [file fcaa197_supplementary_data.pdf]

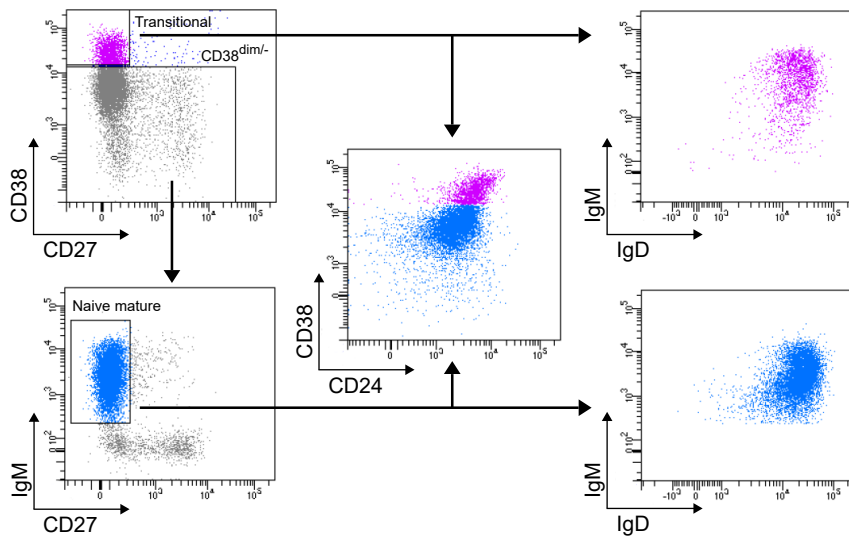

**Supplementary Figure 1. Expression of CD24, IgD and IgM on transitional and naive mature B cells in NMOSD blood.**

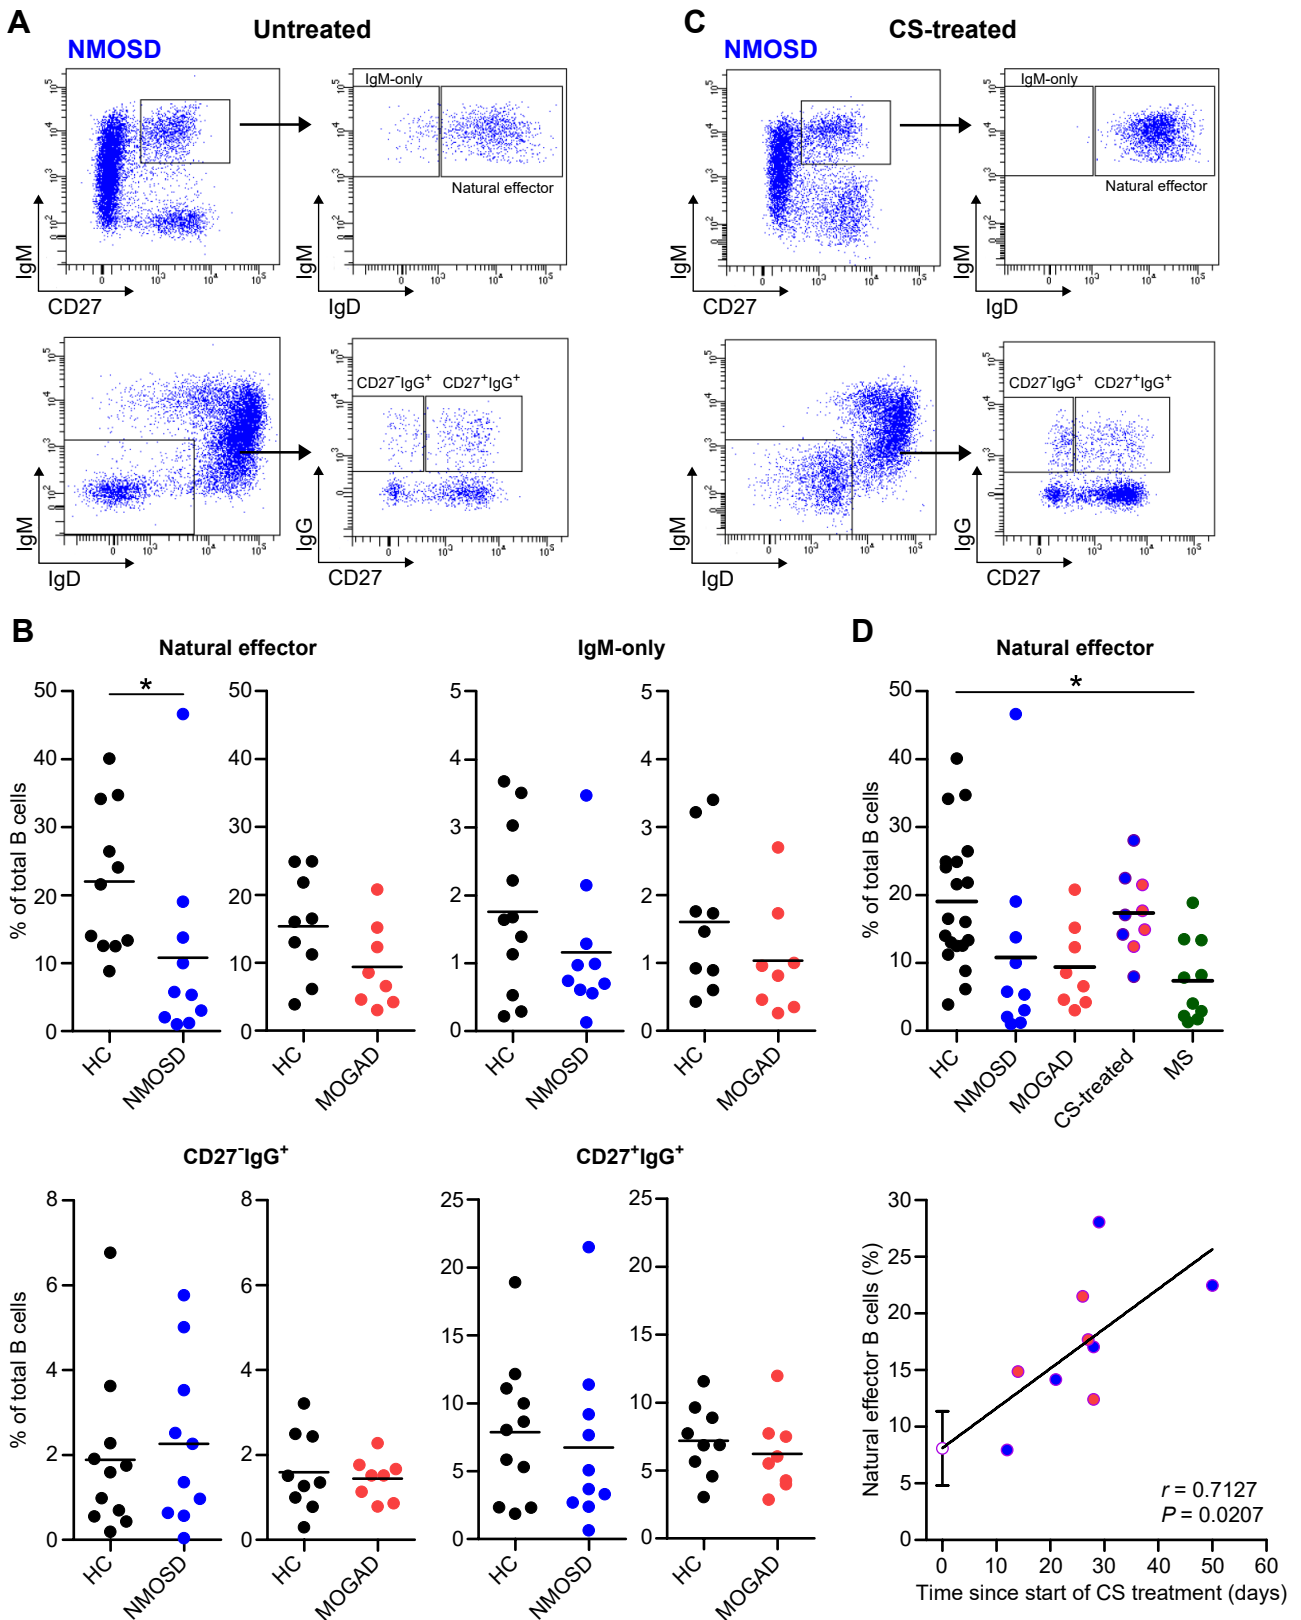

**Supplementary Figure 2. Presence of *ex vivo* memory B-cell subsets in the blood of untreated and CS-treated NMOSD, MOGAD, MS and HC subgroups.**

Gating strategy for the identification of IgM-only (CD27<sup>+</sup>IgM<sup>+</sup>IgD<sup>-</sup>), natural effector (CD27<sup>+</sup>IgM<sup>+</sup>IgD<sup>+</sup>) and IgG<sup>+</sup> (both CD27<sup>-</sup> and CD27<sup>+</sup>) memory B cells from the blood of a treatment-naïve (A) and a corticosteroid (CS)-treated (C) AQP4-IgG positive NMOSD patient. Fractions were compared between NMOSD ( $n = 10$ ) and MOGAD ( $n = 8$ ) and age- and gender-matched healthy controls (HC) for each group (for NMOSD,  $n = 11$ ; for MOGAD  $n = 9$ ; B). (D) Fractions of natural effector memory B cells in CS-naïve NMOSD, MOGAD, MS and HC, as well as CS-treated NMOSD and MOGAD groups and their correlation to time since start of CS treatment.

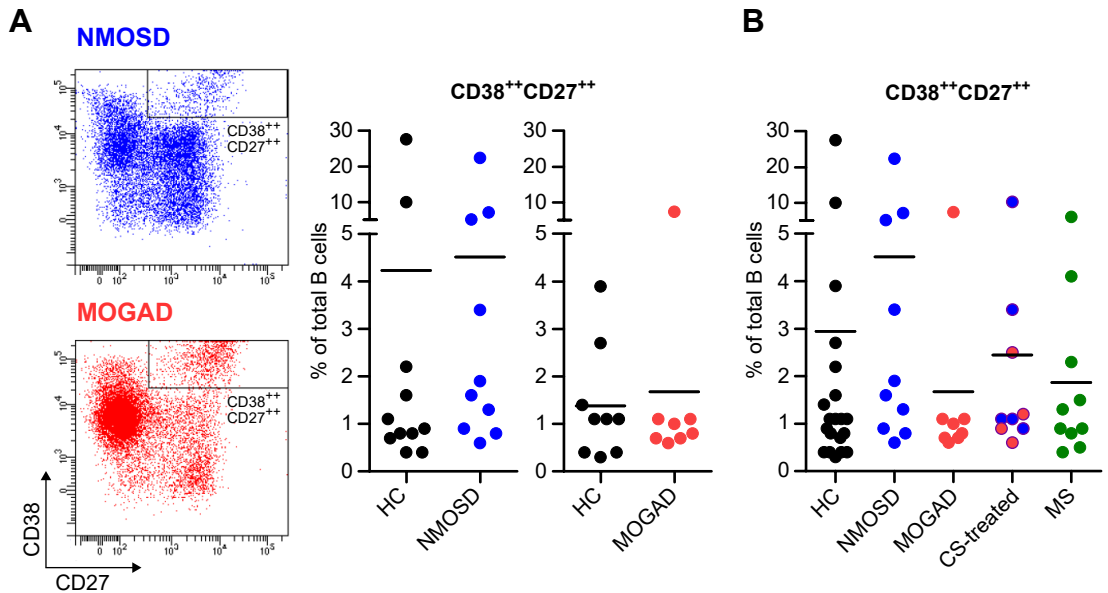

**Supplementary Figure 3. Frequencies of *ex vivo* plasmablasts in the blood of untreated and CS-treated NMOSD, MOGAD, MS and HC subgroups.**

Representative gating and frequencies of circulating plasmablasts (CD38<sup>++</sup>CD27<sup>++</sup>) in treatment-naive (A) and corticosteroid (CS)-treated (B) NMOSD and MOGAD patients. Fractions of *ex vivo* plasmablasts within the total CD19<sup>+</sup> pool were compared between CS-naive NMOSD ( $n = 10$ ), CS-naive MOGAD ( $n = 8$ ), CS-treated NMOSD or MOGAD ( $n = 9$ ), MS ( $n = 10$ ) as well as age- and gender-matched HC (for NMOSD,  $n = 11$ ; for MOGAD,  $n = 9$ ) groups.

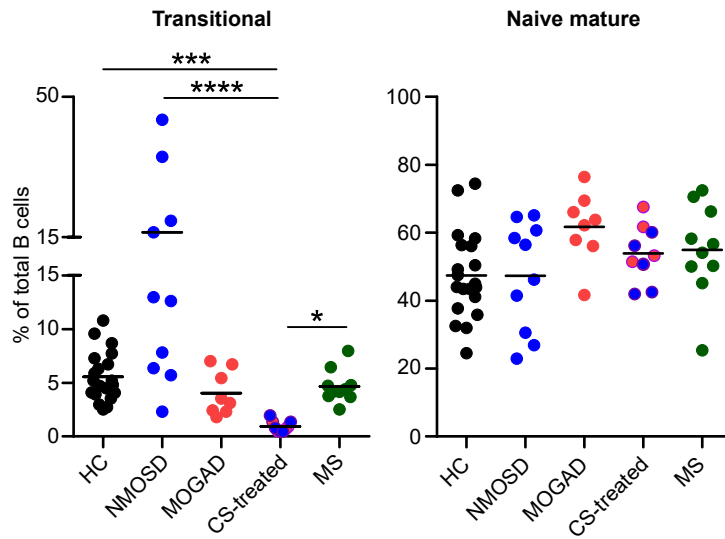

**Supplementary Figure 4. Composition of the naive B-cell pool in the blood of untreated and CS-treated NMOSD, MOGAD, MS and HC subgroups.**

Proportions of circulating transitional and naive mature B cells within the total CD19<sup>+</sup> pool were assessed in CS-naive NMOSD ( $n = 10$ ), CS-naive MOGAD ( $n = 8$ ), CS-treated NMOSD or MOGAD ( $n = 9$ ), MS ( $n = 10$ ) and HC ( $n = 20$ ) groups.

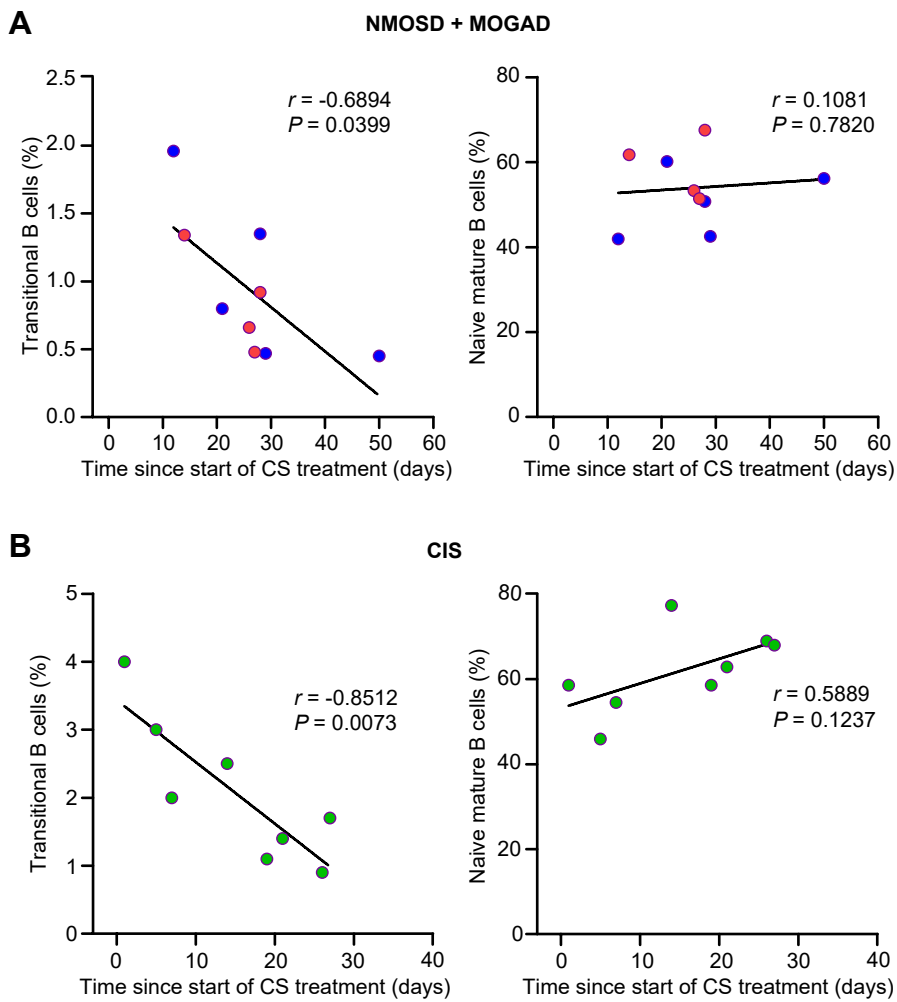

**Supplementary Figure 5. The impact of CS treatment on the presence of transitional and naive mature B cells in the blood.**

Proportions of circulating transitional and naive mature B cells were correlated to time since start of CS treatment in NMOSD or MOGAD ( $n = 9$ ; **A**) and clinically isolated syndrome (CIS,  $n = 8$ ; **B**) groups.

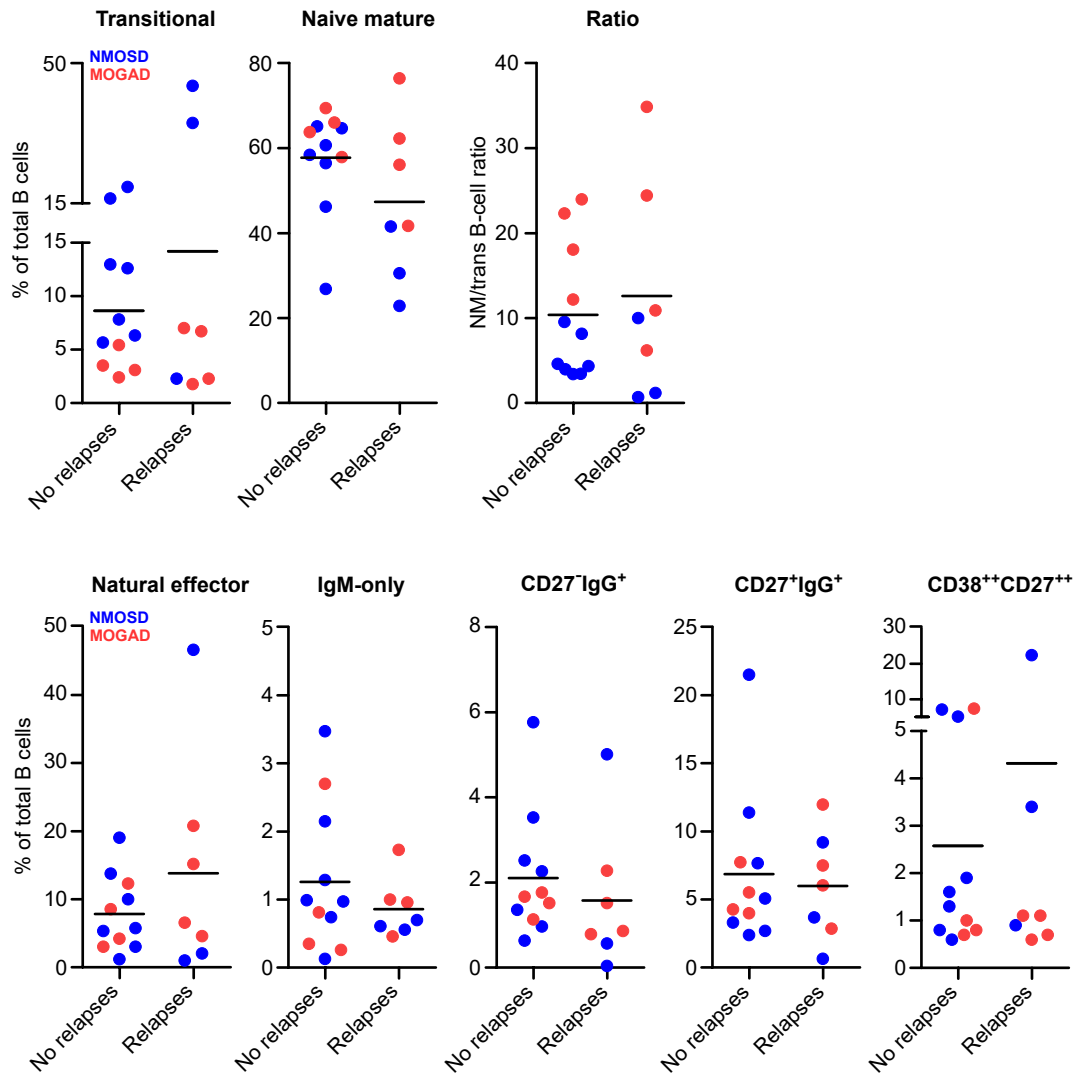

**Supplementary Figure 6. Presence of *ex vivo* B-cell subsets in relapsing and non-relapsing NMOSD and MOGAD subgroups.**

Proportions of naive and memory B-cell subsets as well as plasmablasts (CD38<sup>++</sup>CD27<sup>++</sup>) were analyzed in the blood using FACS and compared between CS-naive NMOSD (blue) and MOGAD (red) patients with and without relapses.

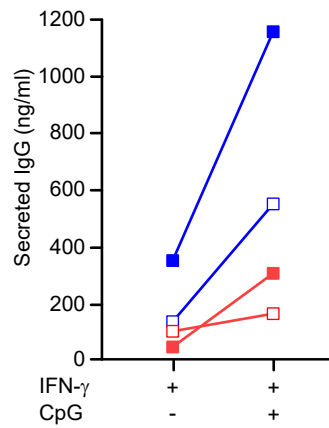

**Supplementary Figure 7. Validation of the differences in IgG secretion by *in vitro*-generated plasmablasts between NMOSD and MOGAD subgroups.**

Plasmablasts were generated from naive mature B cells of a relapsing (solid box) and non-relapsing (open box) NMOSD and MOGAD patient under IFN- $\gamma$  and/or CpG-ODN-inducing germinal-center like conditions. IgG secretion was compared after 11 days.
